# Supplementary material for: Influence of the Deposition Parameters on the Properties of TiO2 Thin Films on Spherical Substrates
Source: MDPI journal article supplement (doi:10.3390/ma16144899), 2023-07-08

Supplementary materials

# Influence of the Deposition Parameters on the Properties of TiO<sub>2</sub> Thin Films on Spherical Substrates

Maria Covei <sup>1</sup>, Cristina Bogatu <sup>1</sup>, Silvioara Gheorghita <sup>1</sup>, Anca Duta <sup>1</sup>, Hermine Stroescu <sup>2,\*</sup>, Madalina Nicolescu <sup>2</sup>, Jose Maria Calderon-Moreno <sup>2</sup>, Irina Atkinson <sup>2</sup>, Veronica Bratan <sup>2</sup> and Mariuca Gartner <sup>2,\*</sup>

<sup>1</sup> Department of Product Design, Mechatronics and Environment, Transilvania University of Brasov, 29 Eroilor Bd., 500036 Brasov, Romania; maria.covei@unitbv.ro (M.C.); cristina.bogatu@unitbv.ro (C.B.); silvioara.gheorghita@unitbv.ro (S.G.); a.duta@unitbv.ro (A.D.)

<sup>2</sup> “Ilie Murgulescu” Institute of Physical Chemistry, Romanian Academy, 202 Splaiul Independentei St., 060021 Bucharest, Romania; mnicolescu@icf.ro (M.N.); calderon@icf.ro (J.M.C.-M.); iatkinson@icf.ro (I.A.); vbratan@icf.ro (V.B.)

\* Correspondence: hstroescu@icf.ro (H.S.); mgartner@icf.ro (M.G.)

Table S1. Water contact angle on flat microscopic glass slides.

| Etching duration [h] | 0.5  | 1    | 2    | 24   | 48   |
|----------------------|------|------|------|------|------|
| $\theta$ [°]         | 34.5 | 39.8 | 35.8 | 30.7 | 32.8 |

Figure S1. SEM images of the TiO<sub>2</sub> layers before (a, b) and after 9 h (c, d) and 18 h (e, f) of stability testing for the samples obtained using undiluted (a, c, e) and diluted sols (b, d, f), matching the points in Table 3

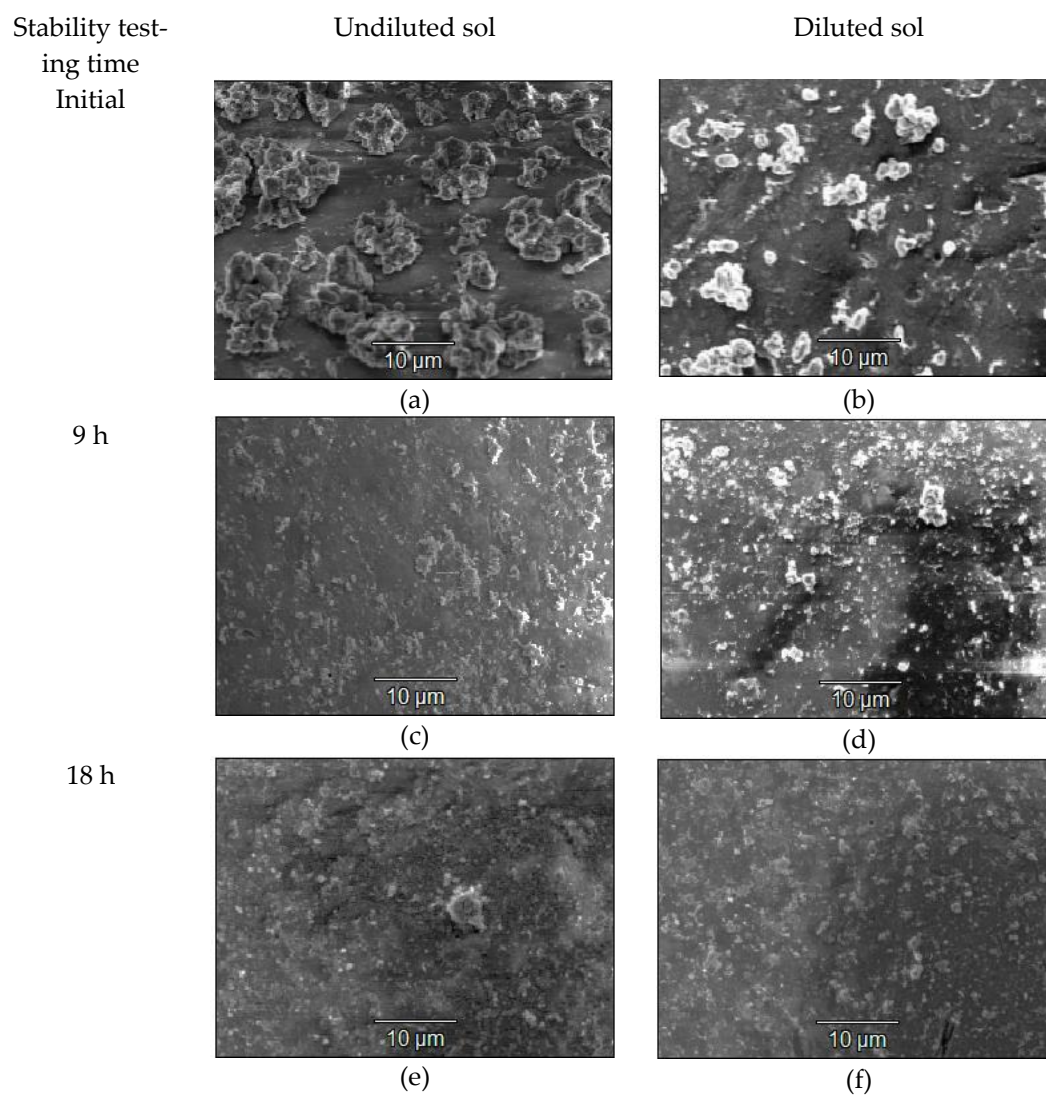

Figure S2. SEM images of the TiO<sub>2</sub> thin films with one or two layers, before and after UV-Vis photocatalysis (PC) of methylene blue, matching the points in Table 4.

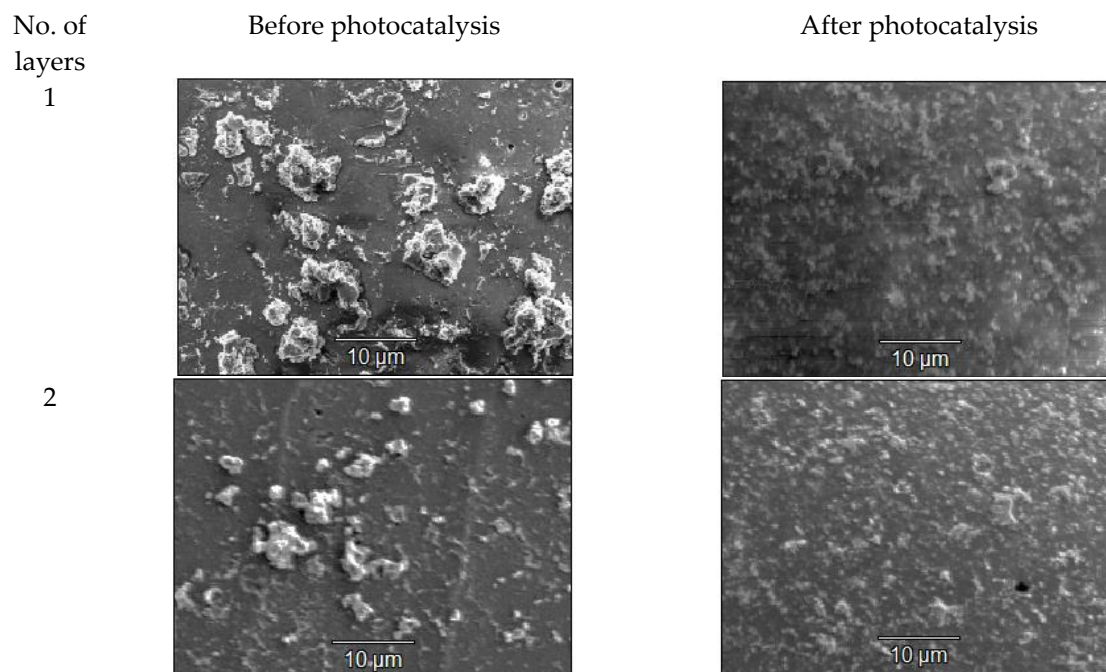

Supplement: s1 [file s1]
